# Supplementary material
Source: bioRxiv or medRxiv preprint supplement (http://medrxiv.org/highwire/filestream/87003/field_highwire_adjunct_files/0/2020.06.21.20136853-1.pdf)
Supplement: Supplementary file [file 2020.06.21.20136853-1.pdf]

## SUPPLEMENTARY MATERIALS

### Modelling the impact of lockdown easing measures on cumulative COVID-19 cases and deaths in England

Ziauddeen H, PhD <sup>1,2,3</sup>, Subramaniam N, BSc <sup>1,2</sup>, Gurdasani D, PhD† <sup>4</sup>.

**Supplementary Table 1: Parameters estimated by Bayesian model**

| Variable                  | Parameter                                                       | No. | Priors               |
|---------------------------|-----------------------------------------------------------------|-----|----------------------|
| $c_t$ , where $t=1\dots6$ | Number of initial cases on first six days                       | 6   | exponential(1.0/tau) |
| $R_0$                     | Baseline Reproduction Number                                    | 1   | Normal(2.4,0.5)      |
| $R_t$                     | Time varying effective reproduction number                      | 9   | Normal(0.8,0.25)     |
| $\phi$                    | variance parameter for negative binomial distribution of deaths | 1   | normal(0,5)          |
| $\tau$                    | parameter in prior of $c_t$                                     | 1   | exponential(0.03)    |

**Supplementary Table 2: Comparison of Bayesian models with different constraints on changes in  $R_t$**

| Model   | RMSE | EPLD   | SE   | diff EPLD model3 | diff SE model3 |
|---------|------|--------|------|------------------|----------------|
| model 1 | 39.8 | -446.7 | 24.8 | -1.3             | 0.5            |
| model 2 | 29.9 | -446.7 | 24.3 | -1.3             | 0.9            |
| model 3 | 29.5 | -445.4 | 24.6 | NA               | NA             |

Supp. Table 2 represents model comparisons between Models 1-3, as specified in the text. RMSE represents the Root mean squared error between estimated and observed deaths for each model. EPLD represents the expected log pointwise predictive density which approximates leave-one-out (LOO) cross-validation. Less negative scores suggest better fit. SE is the standard error of EPLD. We assess the difference in EPLD between all models and the best performing model (Model 3 in this case), comparing the difference in EPLD (diff\_EPLD\_model3) with the standard error of the difference (diff\_SE\_model3). Although all three models appear comparable in performance, Model 3 appears to show the best fit with the lowest RMSE, and the least negative EPLD.

**Supplementary Table 3: Comparison of models excluding specific change points for  $R_t$** 

| <b>Change points removed</b> | <b>RMSE</b> | <b>EPLD</b> | <b>SE</b> | <b>diff EPLD</b> | <b>diff SE</b> |
|------------------------------|-------------|-------------|-----------|------------------|----------------|
| 23rd March                   | 49.4        | -445.4      | 24.6      | -1.3             | 0.5            |
| 16th March                   | 123.6       | -508.0      | 36.2      | -61.3            | 5.1            |
| 13th May                     | 40.5        | -447.0      | 24.8      | -0.3             | 0.1            |
| None (all included)          | 25.9        | -446.7      | 24.8      | -                | -              |

Supp. Table 3 represents model comparisons between Models that constrain  $R_t$  at each of the 3 hypothesised change points at which point social distancing or lockdown measures were introduced (16<sup>th</sup> March and 23<sup>rd</sup> March), or when lockdown measures were eased (13<sup>th</sup> May). The first column represents the change point left out in each model, with the last model with all three change points being the comparator, as specified in the text. RMSE represents the Root mean squared error between estimated and observed deaths for each model. EPLD represents the expected log pointwise predictive density which approximates leave-one-out (LOO) cross-validation. Less negative scores suggest better fit. SE is the standard error of EPLD. We assess the difference in EPLD between all models and the model with all three change points, comparing the difference in EPLD (diff\_EPLD) with the standard error of the difference (diff\_SE). The model leaving out 16<sup>th</sup> March as a change point, i.e. constraining  $R_t$  to remain constant at this point appears to adversely impact fit the most. The model with three change points predictably shows the best fit, although the change point on the 13<sup>th</sup> May appears to be least important to goodness of fit.

**Supplementary Table 4: Cumulative cases and deaths in lockdown easing scenarios in primary model**

| <b>Rt 1st June</b> | <b>Rt 15th June</b> | <b>Rt 1st July</b> | <b>Cumulative cases</b>   | <b>Cumulative deaths</b> | <b>Excess deaths</b> | <b>Excess cases</b>       |
|--------------------|---------------------|--------------------|---------------------------|--------------------------|----------------------|---------------------------|
| 0.81               | 0.81                | 0.81               | 5632361(5173510-6915570)  | 49458(45501-60367)       | 0                    | 0                         |
| 0.6                | 0.6                 | 0.6                | 5509476(5140350-6302650)  | 48481(45234-55452)       | -1026(-5096,-87)     | -127932(-635317,-10887)   |
| 0.65               | 0.65                | 0.65               | 5525601(5144795-6381955)  | 48617(45270-56123)       | -878(-4360,-74)      | -110621(-549336,-9414)    |
| 0.7                | 0.7                 | 0.7                | 5550714(5153275-6491537)  | 48827(45341-57050)       | -686(-3406,-58)      | -87720(-435596,-7465)     |
| 0.75               | 0.75                | 0.75               | 5579324(5159964,6646394)  | 49058(45403-49058)       | -431(-2140,-36)      | -56286(-279485,-4790)     |
| 0.8                | 0.8                 | 0.8                | 5620480(5170718-6861630)  | 49393(45484-59965)       | -84(-417,-7)         | -11301(-56109,-961)       |
| 0.85               | 0.85                | 0.85               | 5689416(5184792-7183460)  | 49866(45589-62258)       | 400(34,1988)         | 56019(4768,278083)        |
| 0.85               | 0.85                | 0.9                | 5711579(5188792-7308127)  | 49978(45607-62846)       | 518(44,2574)         | 82022(6979,407641)        |
| 0.85               | 0.9                 | 0.9                | 5743414(5196366-7476020)  | 50196(45647-50196)       | 748(63,3722)         | 115426(9815,574095)       |
| 0.85               | 0.9                 | 0.95               | 5787395(5201797-7692210)  | 50357(45676-64793)       | 924(78,4597)         | 159073(13525,791551)      |
| 0.9                | 0.9                 | 0.9                | 5790145(5202141-7701506)  | 50519(45726-65640)       | 1094(93,5427)        | 161374(13737,800867)      |
| 0.9                | 0.9                 | 0.95               | 5835939(5215932-7948661)  | 50721(45752-66642)       | 1298(110,6441)       | 211937(18038,1052576)     |
| 0.9                | 0.95                | 0.95               | 5890916(5231290-8222697)  | 51059(45837-68393)       | 1642(139,8157)       | 266335(22657,1323354)     |
| 0.9                | 0.95                | 1                  | 5977038(5251087-8651501)  | 51339(45898-69842)       | 1946(165,9667)       | 351460(29894,1747026)     |
| 0.95               | 0.95                | 0.95               | 5960687(5247436-8556522)  | 51482(45914-70654)       | 2108(179,10453)      | 333209(28370,1653092)     |
| 0.95               | 0.95                | 1                  | 6054039(5266297-9050019)  | 51852(46040-72397)       | 2458(209,12192)      | 431313(36717,2140954)     |
| 0.95               | 1                   | 1                  | 6144873(5278363-9505422)  | 52397(46165-75013)       | 2977(253,14775)      | 521833(44410,2591144)     |
| 0.95               | 1                   | 1.05               | 6305312(5294301-10332764) | 52883(46250-77649)       | 3496(297,17356)      | 687119(58467,3412953)     |
| 1                  | 1                   | 1                  | 6244213(5286410-10011897) | 53022(46265-78249)       | 3619(308,17937)      | 623524(53104,3092007)     |
| 1                  | 1                   | 1.05               | 6424833(5313936-10950161) | 53600(46385-81203)       | 4215(359,20895)      | 813129(69240,4033784)     |
| 1                  | 1.05                | 1.05               | 6576506(5331499-11709305) | 54370(46473-85159)       | 5002(426,24807)      | 966759(82304,4796947)     |
| 1                  | 1.05                | 1.1                | 6886939(5369059-13285488) | 55235(46541-89574)       | 5883(501,29183)      | 1285783(109452,6381636)   |
| 1.05               | 1.05                | 1.05               | 6735809(5355535-12497036) | 55257(46546-89643)       | 5906(503,29254)      | 1127709(96082,5589085)    |
| 1.05               | 1.05                | 1.1                | 7094008(5392553-14295062) | 56209(46724-94609)       | 6912(589,34247)      | 1492080(127108,7397005)   |
| 1.05               | 1.1                 | 1.1                | 7360787(5413045-15602425) | 57402(46866-100532)      | 8112(691,40201)      | 1757003(149653,8711591)   |
| 1.05               | 1.1                 | 1.15               | 7978843(5468689-18619481) | 58845(47082-107855)      | 9596(817,47563)      | 2368417(201711,11745319)  |
| 1.1                | 1.1                 | 1.1                | 7627033(5440955-16891454) | 58640(47050-106873)      | 9410(802,46581)      | 2020669(172250,10008055)  |
| 1.1                | 1.1                 | 1.15               | 8329204(5503120-20324645) | 60320(47209-115191)      | 11097(946,54942)     | 2716047(231501,2716047)   |
| 1.1                | 1.15                | 1.15               | 8793270(5537174-22616449) | 62138(47434-124243)      | 12933(1102,64044)    | 3178393(270877,15746561)  |
| 1.1                | 1.15                | 1.2                | 9940071(5632587-28376149) | 64625(47624-136460)      | 15412(1313,76329)    | 4340411(369882,215062610) |

Supplementary Table 4 represents the estimated cumulative deaths, cumulative cases, and excess deaths and cases in different scenarios of changing Rt at points of easing lockdown in comparison with the baseline scenario of Rt remaining constant at 0.81.

**Supplementary Table 5: Cumulative cases and deaths in lockdown easing scenarios in model with long serial interval**

| Rt<br>1st<br>June | Rt<br>15th<br>June | Rt<br>1st<br>July | Cumulative cases          | Cumulative deaths   | Excess deaths     | Excess cases             |
|-------------------|--------------------|-------------------|---------------------------|---------------------|-------------------|--------------------------|
| 0.81              | 0.81               | 0.81              | 5770514(5211348-6995778)  | 50512(45795-60673)  | 0(0,0)            | 0(0,0)                   |
| 0.6               | 0.6                | 0.6               | 5565836(5147626-6306260)  | 48962(45295-55433)  | -1530(-5353,-262) | -202140(-707944,-34538)  |
| 0.65              | 0.65               | 0.65              | 5595060(5158988-6404095)  | 49199(45388-56244)  | -1292(-4519,-221) | -173129(-606278,-29587)  |
| 0.7               | 0.7                | 0.7               | 5634043(5171297-6532308)  | 49507(45495-57272)  | -992(-3470,-170)  | -135443(-474240,-23153)  |
| 0.75              | 0.75               | 0.75              | 5683427(5187987-6706775)  | 49882(45615-58553)  | -610(-2133,-105)  | -85248(-298431,-14578)   |
| 0.8               | 0.8                | 0.8               | 5755680(5207104-6941334)  | 50403(45769-60249)  | -116(-404,-20)    | -16655(-58290,-2849)     |
| 0.85              | 0.85               | 0.85              | 5847345(5234625-7274127)  | 51026(45947-62450)  | 532(91,1860)      | 79473(13603,278057)      |
| 0.85              | 0.85               | 0.9               | 5886578(5246680-7415032)  | 51201(45996-63081)  | 709(121,2481)     | 120159(20473,421431)     |
| 0.85              | 0.9                | 0.9               | 5930630(5260107-7571204)  | 51491(46076-64128)  | 999(170,3506)     | 163569(27798,574412)     |
| 0.85              | 0.9                | 0.95              | 5993581(5273667-7798411)  | 51727(46140-64953)  | 1237(210,4344)    | 223704(37943,786326)     |
| 0.9               | 0.9                | 0.9               | 5986872(5271574-7770844)  | 51874(46198-65466)  | 1393(239,4863)    | 217420(37235,760383)     |
| 0.9               | 0.9                | 0.95              | 6052601(5290635-8011751)  | 52150(46271-66414)  | 1658(284,5796)    | 284409(48600,996016)     |
| 0.9               | 0.95               | 0.95              | 6116912(5306660-8226648)  | 52555(46349-67901)  | 2052(351,7182)    | 347318(59258,1217297)    |
| 0.9               | 0.95               | 1                 | 6219910(5332062-8589480)  | 52918(46475-69247)  | 2409(412,8439)    | 446404(76045,1565830)    |
| 0.95              | 0.95               | 0.95              | 6191412(5327786-8495735)  | 53054(46502-69733)  | 2548(437,8892)    | 419621(71913,1466787)    |
| 0.95              | 0.95               | 1                 | 6298436(5354125-8877413)  | 53438(46613-71062)  | 2944(505,10285)   | 529664(90659,1853182)    |
| 0.95              | 1                  | 1                 | 6386181(5371562-9195832)  | 53988(46728-72946)  | 3480(596,12167)   | 621934(106359,2177174)   |
| 0.95              | 1                  | 1.05              | 6543790(5408114-9776279)  | 54538(46899-74962)  | 4014(687,14042)   | 784701(134030,2748698)   |
| 1                 | 1                  | 1                 | 6483640(5391724-9545832)  | 54642(46919-75263)  | 4113(707,14346)   | 721424(123736,2520171)   |
| 1                 | 1                  | 1.05              | 6660710(5439589-10176991) | 55215(47060-77315)  | 4704(808,16420)   | 901676(154510,3152041)   |
| 1                 | 1.05               | 1.05              | 6799712(5467759-10630673) | 55908(47228-79807)  | 5436(933,18983)   | 1038508(177872,3631710)  |
| 1                 | 1.05               | 1.1               | 7065572(5508833-11578976) | 56692(47341-82629)  | 6229(1068,21766)  | 1304932(223358,4565657)  |
| 1.05              | 1.05               | 1.05              | 6941664(5487865-11119455) | 56714(47350-82674)  | 6253(1075,21795)  | 1178571(202337,4114119)  |
| 1.05              | 1.05               | 1.1               | 7230966(5541652-12163037) | 57544(47592-85792)  | 7130(1225,24865)  | 1472838(252683,5144062)  |
| 1.05              | 1.1                | 1.1               | 7435811(5578879-12856271) | 58544(47855-89271)  | 8131(1397,28369)  | 1677711(287734,5861114)  |
| 1.05              | 1.1                | 1.15              | 7868151(5646112-14377496) | 59732(48097-93156)  | 9305(1598,32481)  | 2112074(362048,7381365)  |
| 1.1               | 1.1                | 1.1               | 7635385(5610959-13548308) | 59622(48088-92750)  | 9199(1584,32039)  | 1878935(322926,6552933)  |
| 1.1               | 1.1                | 1.15              | 8114551(5697587-15225799) | 60948(48285-97278)  | 10494(1806,36562) | 2357510(404967,8225599)  |
| 1.1               | 1.15               | 1.15              | 8418330(5746149-16305138) | 62281(48509-102158) | 11868(2041,41365) | 2666716(457973,9306311)  |
| 1.1               | 1.15               | 1.2               | 9109676(5863863-18746630) | 63984(48843-108216) | 13598(2338,47413) | 3371793(578843,11770623) |

Supplementary Table 5 represents the estimated cumulative deaths, cumulative cases, and excess deaths and cases in different scenarios of changing Rt at points of easing lockdown in comparison with the baseline scenario of Rt remaining constant at 0.81.

**Supplementary Figure 1: Distribution of R-hat for parameters from final model**

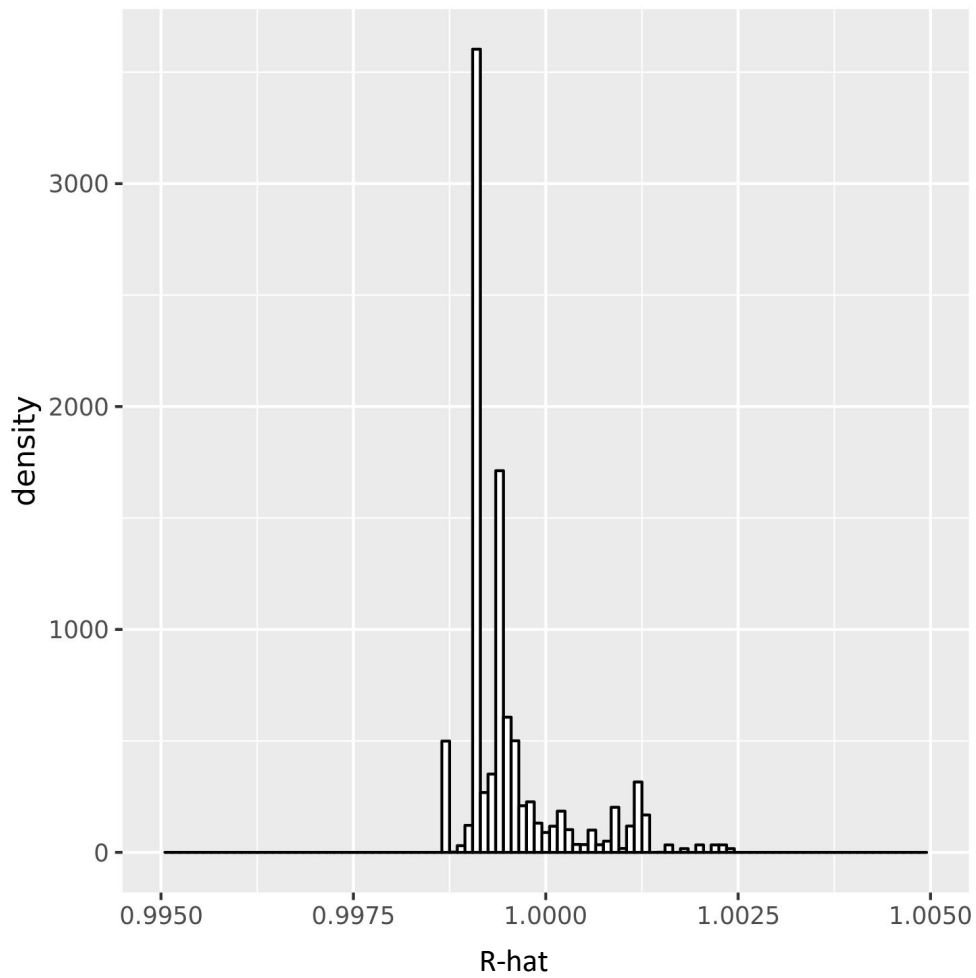

Supplementary Figure 1 represents the estimated R-hat for parameters of the final model. An R-hat near 1 suggests that between-chain variance for a given parameter is equal to the within-chain variance, suggesting convergence of the model. Mean R-hat for parameters was 0.996, with all values well below 1.05.

**Supplementary Figure 2: Pareto shape parameter k distribution for final model**

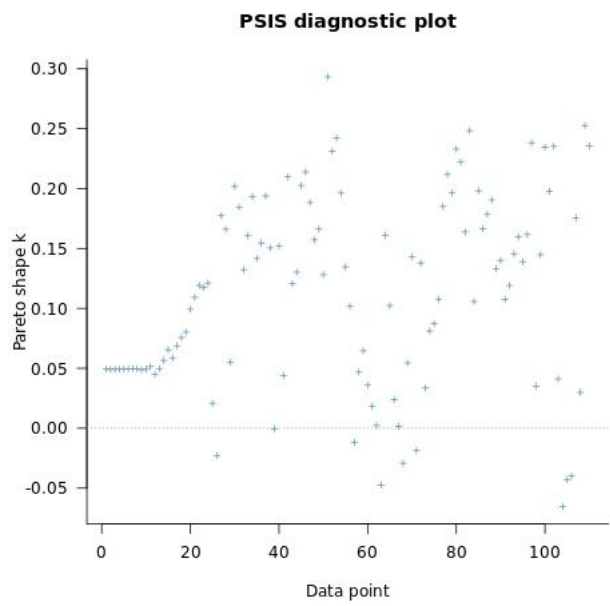

The estimated shape parameter  $k$  of the generalized Pareto distribution can be used to assess the reliability of the estimate from approximations of Leave-one-out cross-validation (LOO). The  $k$  shape values are all below 0.5, suggesting our estimates are reliable.

Supplementary Figure 3:  $R_t$  estimates with uninformative or broad priors

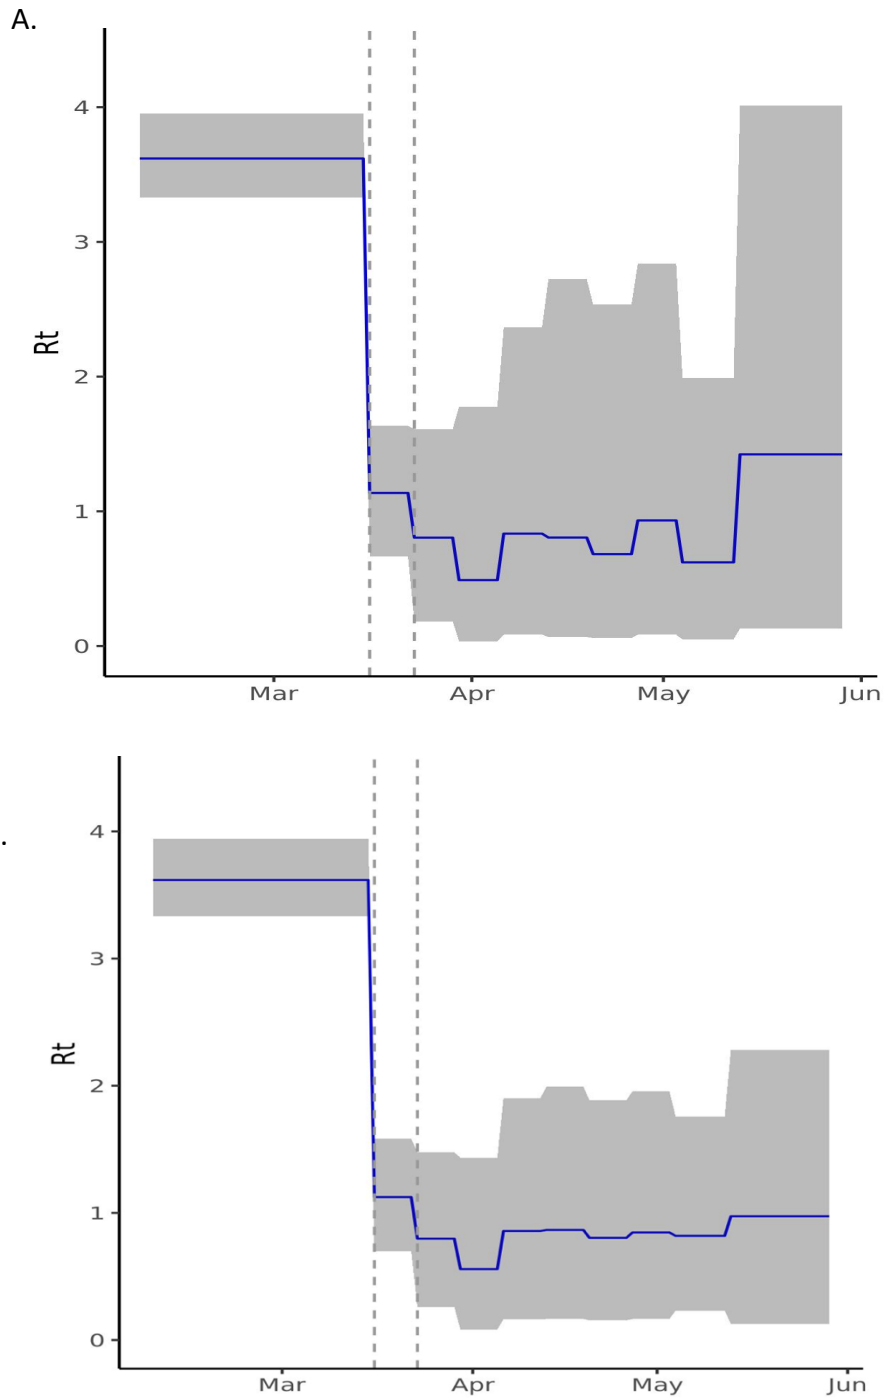

Supplementary Figures 3A. and 3B. represent estimates of  $R_t$  when uninformative priors (A.) or broad priors ( $SD=1$ ) are used for estimation. We find that although median estimates, and patterns of changes are similar as for the original model for most time intervals, substantial uncertainty with higher estimates for  $R_t$  are observed in the final time interval from the 13th May up to the 29<sup>th</sup> May.

**Supplementary Figure 4: Estimated reproduction number in model with longer serial interval**

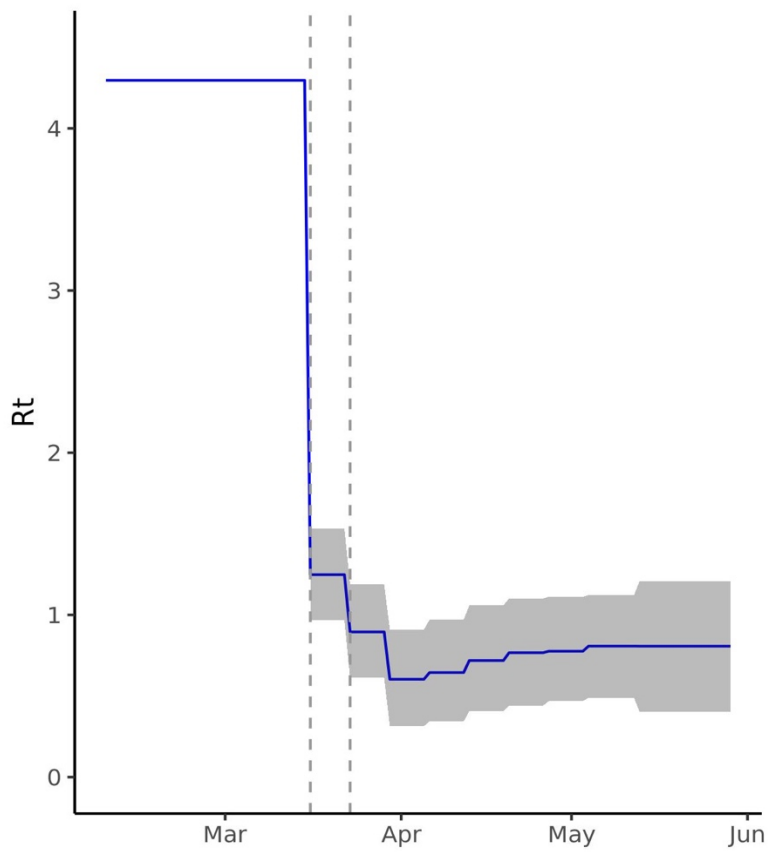

The figure shows the  $R_t$  estimated by a model with a serial interval of mean 6.5 and coefficient of variation of 0.72. While estimates of  $R_0$  are higher in this model, estimates during other time intervals following lockdown are very similar to our primary model.



**Supplementary Figure 5: Predicted and observed deaths in model with longer serial interval**

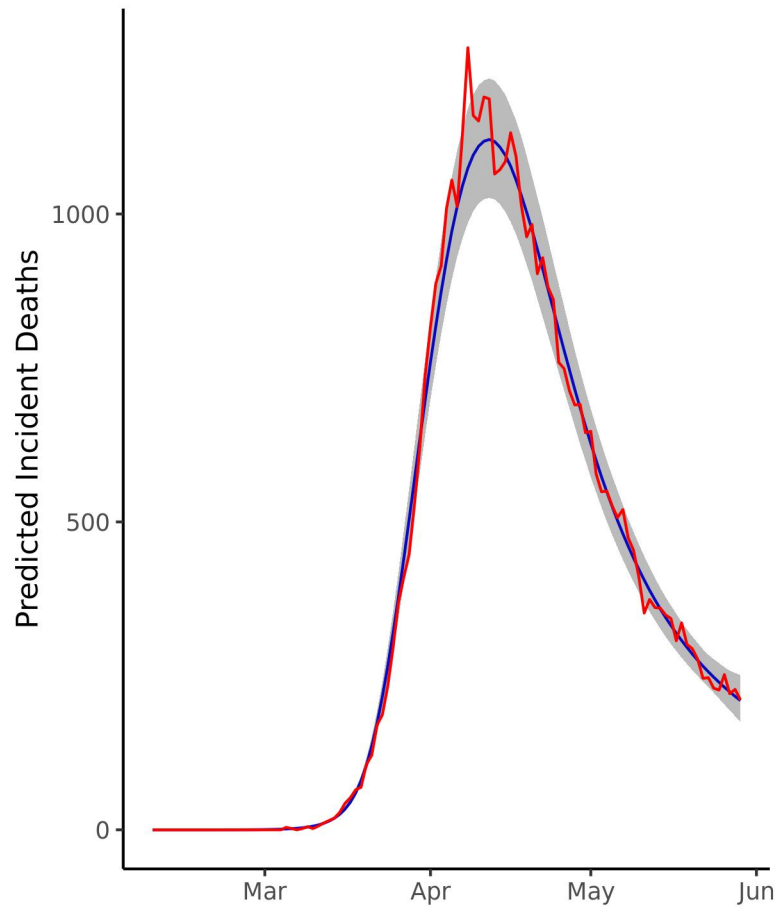

Daily deaths predicted by a model specifying longer serial intervals (blue) with 90% credible intervals (grey) show a good fit to the observed deaths from the ONS (red)
